# Supplementary material for: Electrochemical production of hydrogen peroxide by non-noble metal-doped g-C3N4 under a neutral electrolyte
Source: Royal Society of Chemistry journal article supplement (doi:10.1039/d3nr04307j), 2023-01-01
Supplement: d3nr04307j1.pdf [file d3nr04307j1.pdf]

## Supporting Information

### **Electrochemical production of hydrogen peroxide by non-noble metal-doped g-C<sub>3</sub>N<sub>4</sub> under neutral electrolyte**

Ying Wang,<sup>#</sup> Hongcen Yang,<sup>#</sup> Niandi Lu, Di Wang, Kun Zhu, Zhixia Wang, Lianshan Mou, Yan Zhang, Yawei Zhao, Fei Ma,<sup>\*</sup> Shanglong Peng.<sup>\*</sup>

School of Physical Science and Technology, School of Materials and Energy, Lanzhou University, Lanzhou 730000, China

<sup>\*</sup>Corresponding author. E-mail: [pengshl@lzu.edu.cn](mailto:pengshl@lzu.edu.cn); [maf@lzu.edu.cn](mailto:maf@lzu.edu.cn)

**Figure S1.** XPS full spectra of CNNs, K/ CNNs, Co/CNNs and K-Co/CNNs.

**Figure S2.** (A) K 2p and (B) Co 2p XPS spectra of K/CNNs, Co/ CNNs and K-Co/CNNs.

**Figure S3.** (A) (B) (C) (D) CV curve of CNNs, K/ CNNs, Co/ CNNs, K-CO / CNNs.

**Figure S4.** The different Co contents of the (A) LSV curve, (B) production rate of H<sub>2</sub>O<sub>2</sub>, (C) electron transfer number, (D) Faraday efficiency.

**Figure S5.** The different K contents of the (A) LSV curve, (B) production rate of H<sub>2</sub>O<sub>2</sub>, (C) electron transfer number, (D) Faraday efficiency.

**Figure S6.** (A) CdI curve of CNNs, K/CNNS, Co/CNNS, K-CO /CNNS. (B) the accumulation of H<sub>2</sub>O<sub>2</sub> within 24 hours of K-CO /CNNS.

**Figure S7.** CNNs, K/CNNs, Co/CNNs and K-Co/CNNs of the (A) Comparison of N<sub>2</sub> adsorption and desorption curves, (B) Comparison of BET specific surface area.

**Figure S8.** (A)The absorption spectra of different concentrations of Ce(SO<sub>4</sub>)<sub>2</sub>, (B) the linear relationship between the concentration of Ce(SO<sub>4</sub>)<sub>2</sub> and the absorbance.

**Figure S9.** Tafel plots of CNNs, K/CNNS, Co/CNNs, K-Co/CNNs.

**Figure S10.** (A) Structural diagram of CNNs, (B) Structural diagram of Co/CNNs, (C) Structural diagram of K/CNNs.

**Figure S11.** (A) Structure of CNNs for H<sub>2</sub>O<sub>2</sub> adsorption, (B) Structure of Co/CNNs for H<sub>2</sub>O<sub>2</sub> adsorption, (C) Structure of K/CNNs for H<sub>2</sub>O<sub>2</sub> adsorption.

**Table S1.** The comparisons of different electrocatalysts towards two-electron ORR to produce H<sub>2</sub>O<sub>2</sub>.

**Table S2.** Comparison of direct anthraquinone and oxygen reduction reaction methods for the preparation of H<sub>2</sub>O<sub>2</sub>.

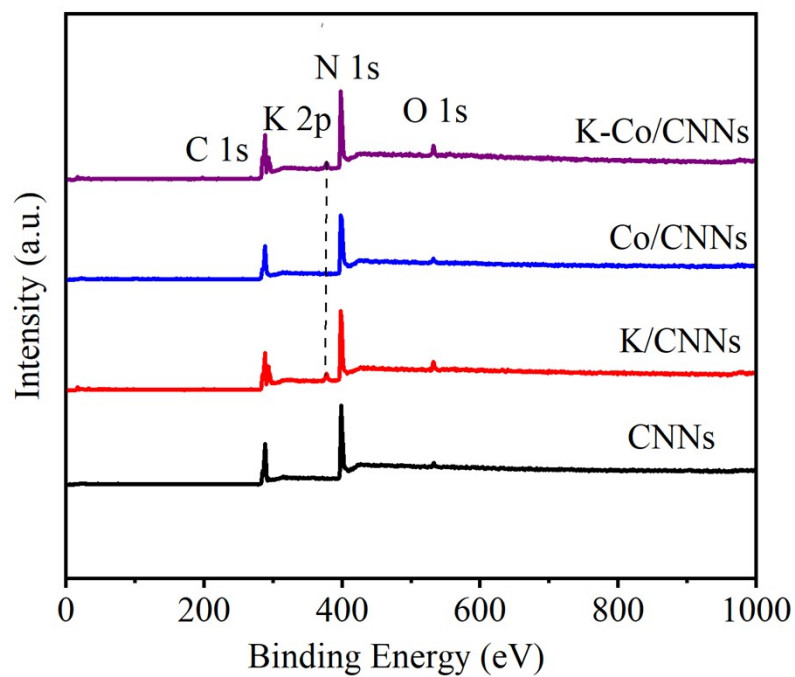

**Figure S1.** XPS full spectra of CNNs, K/ CNNs, Co/CNNs and K-Co/CNNs.

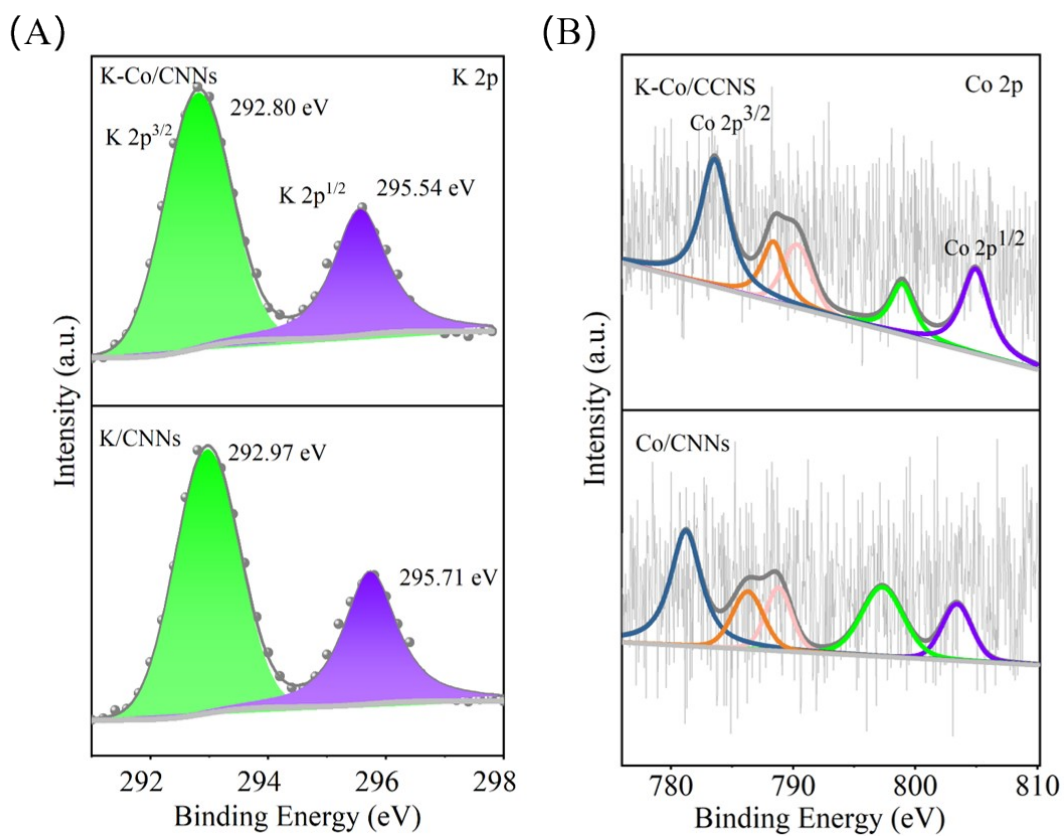

**Figure S2.** (A) K 2p and (B) Co 2p XPS spectra of K/CNNs, Co/ CNNs and K-Co/CNNs.

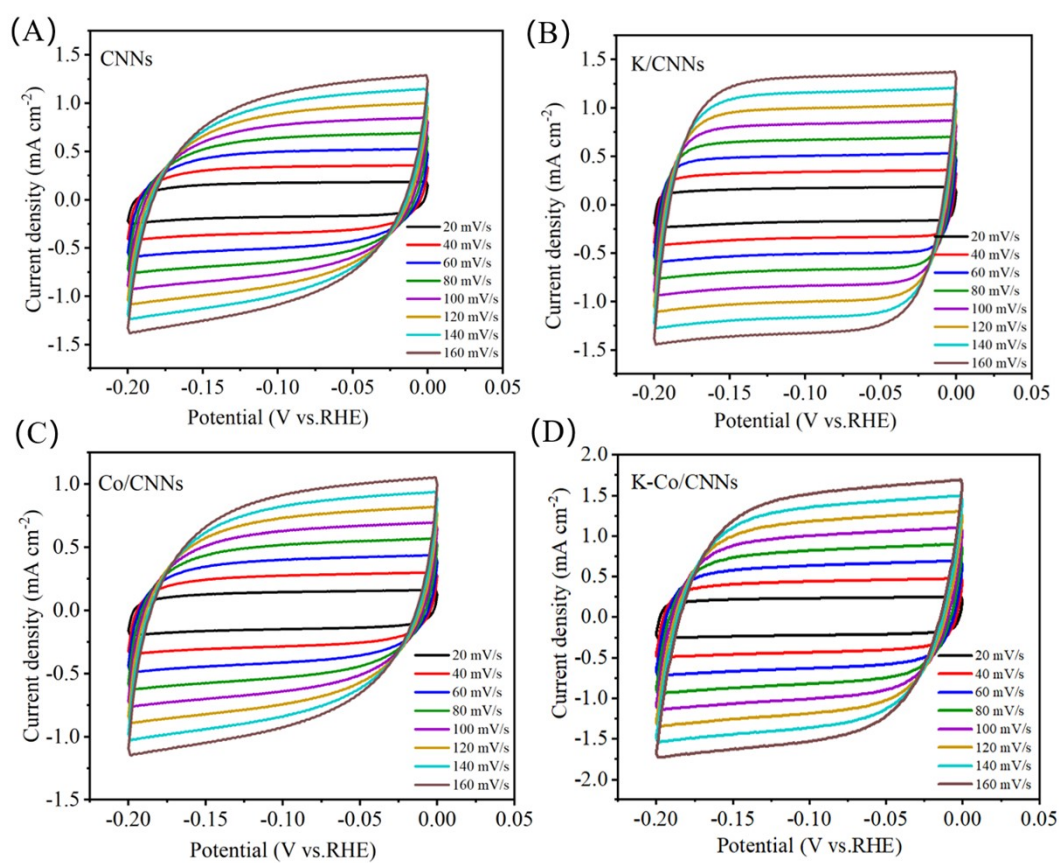

**Figure S3.** (A) (B) (C) (D) CV curve of CNNs, K/ CNNs, Co/ CNNs, K-CO / CNNs.

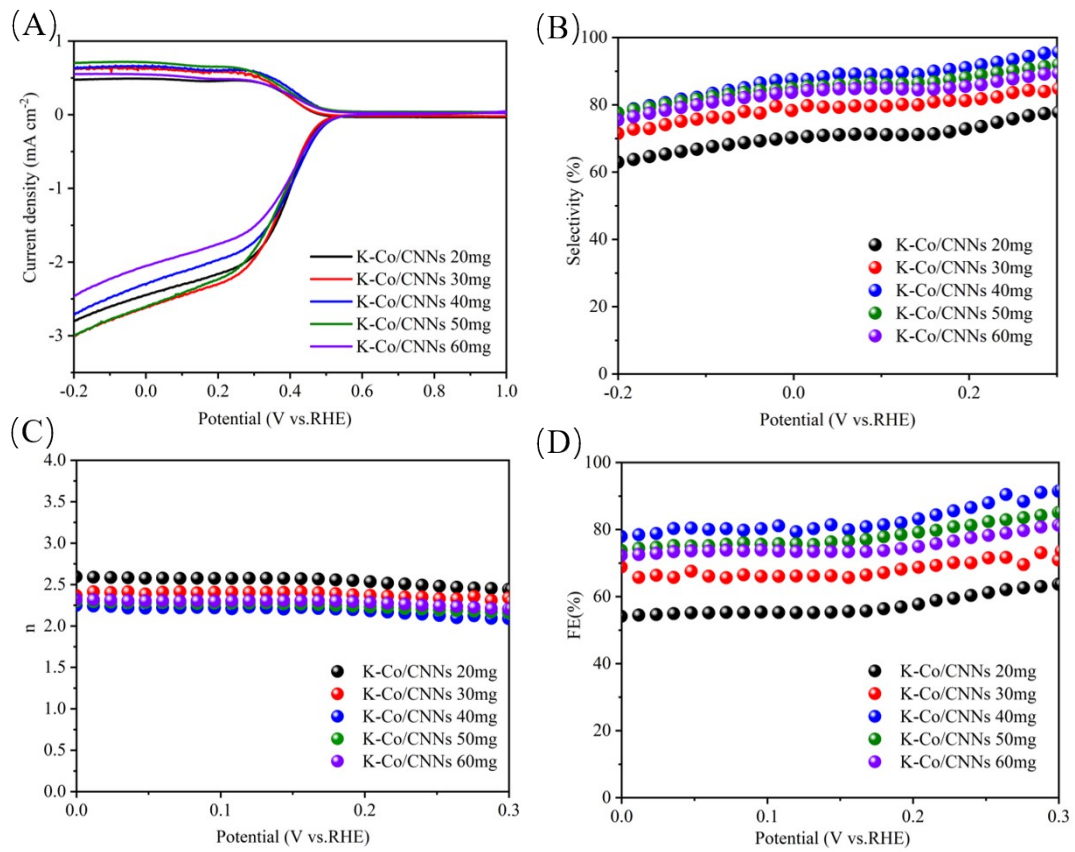

**Figure S4.** The different Co contents of the (A) LSV curve, (B) production rate of  $\text{H}_2\text{O}_2$ , (C) electron transfer number, (D) Faraday efficiency.

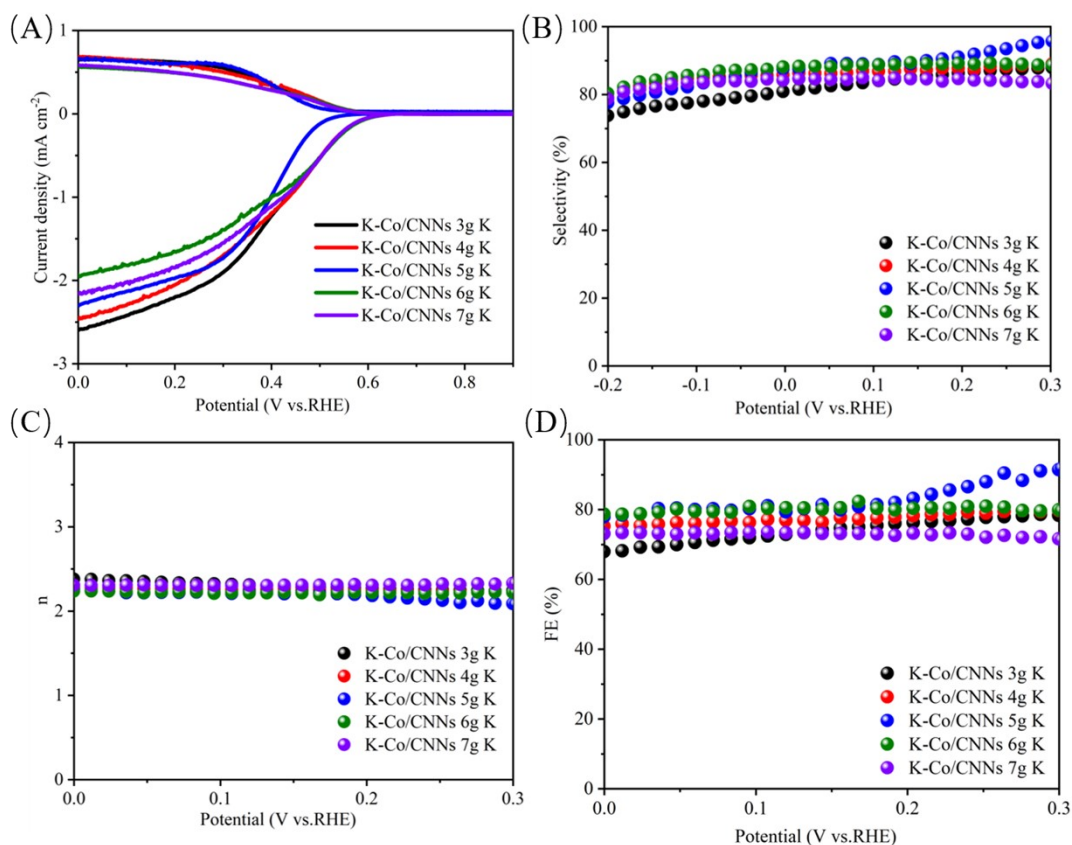

**Figure S5.** The different K contents of the (A) LSV curve, (B) production rate of H<sub>2</sub>O<sub>2</sub>, (C) electron transfer number, (D) Faraday efficiency.

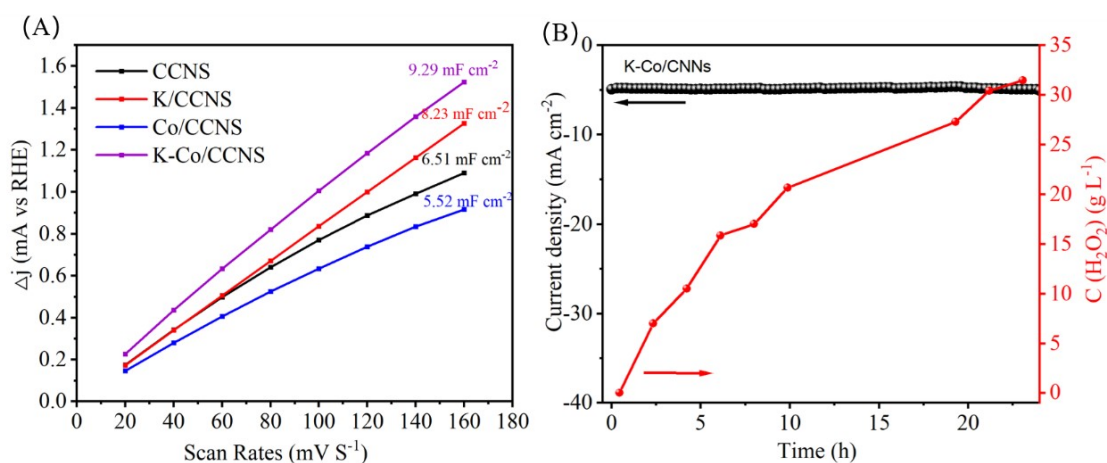

**Figure S6.** (A) CdI curve of CCNS, K/CCNS, Co/CCNS, K-CO /CCNS. (B) the accumulation of H<sub>2</sub>O<sub>2</sub> within 24 hours of K-CO /CCNS.

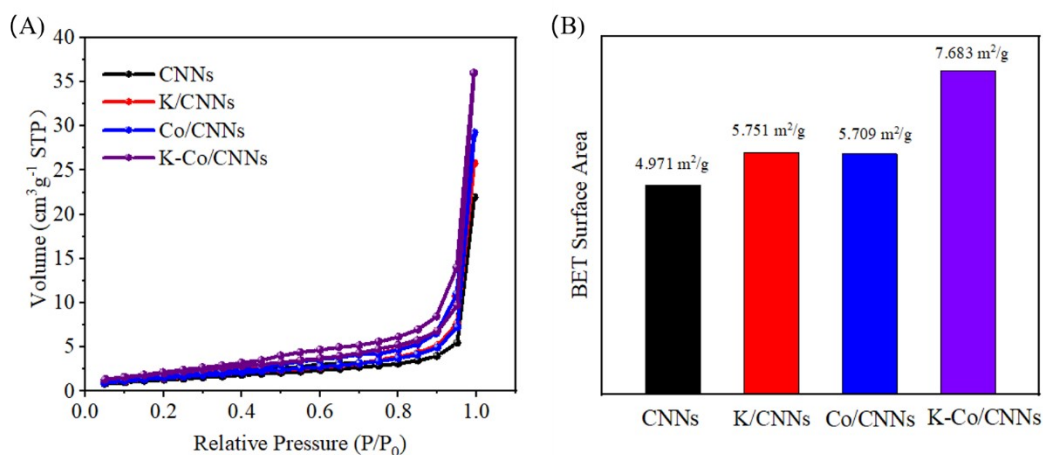

**Figure S7.** CNNs, K/CNNs, Co/CNNs and K-Co/CNNs of the (A) Comparison of  $N_2$  adsorption and desorption curves, (B) Comparison of BET specific surface area.

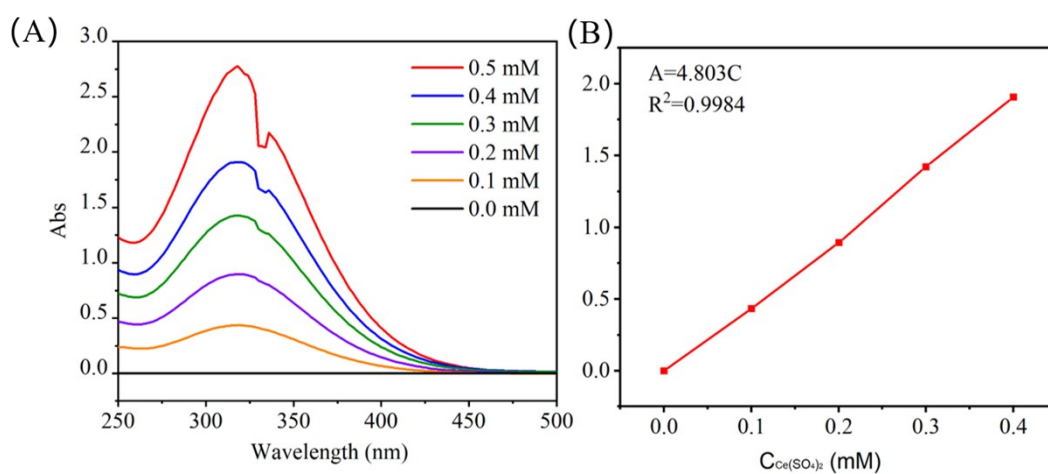

**Figure S8.** (A) The absorption spectra of different concentrations of  $Ce(SO_4)_2$ , (B) the linear relationship between the concentration of  $Ce(SO_4)_2$  and the absorbance.

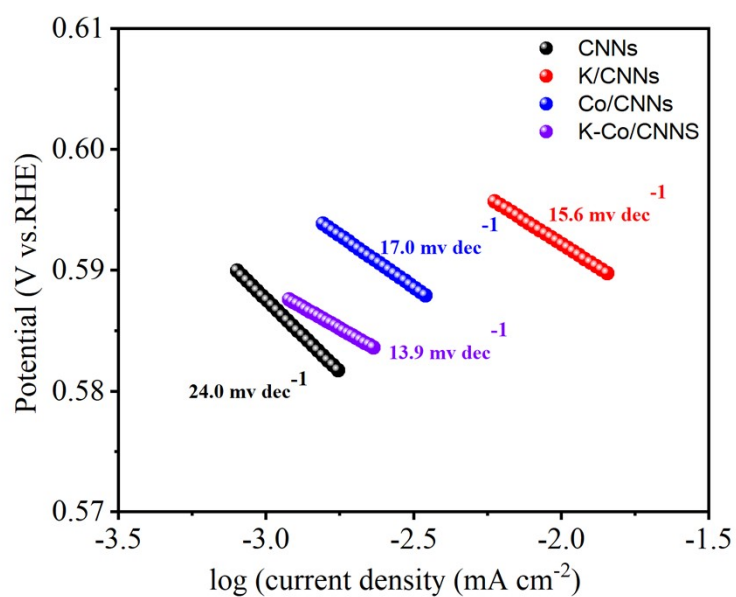

**Figure S9.** Tafel plots of CNNs, K/CNNs, Co/CNNs, K-Co/CNNs.

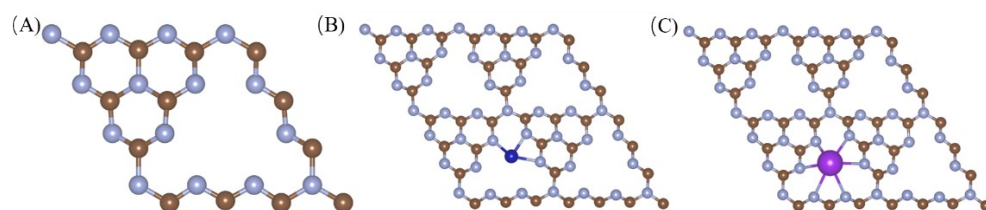

**Figure S10.** (A) Structural diagram of CNNs, (B) Structural diagram of Co/CNNs, (C) Structural diagram of K/CNNs.

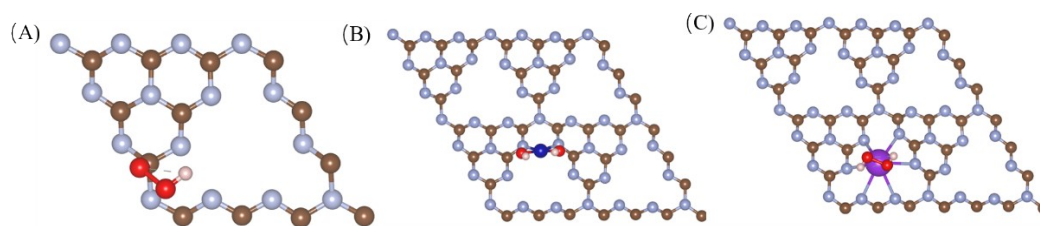

**Figure S11.** (A) Structure of CNNs for H<sub>2</sub>O<sub>2</sub> adsorption, (B) Structure of Co/CNNs for H<sub>2</sub>O<sub>2</sub> adsorption, (C) Structure of K/CNNs for H<sub>2</sub>O<sub>2</sub> adsorption.



**Table S1.** The comparisons of different electrocatalysts towards two-electron ORR to produce H<sub>2</sub>O<sub>2</sub>.

| Catalyst            | Electrolyte                                    | Selectivity                  | Ref.      |
|---------------------|------------------------------------------------|------------------------------|-----------|
| K-Co/CNNs           | 0.1 M PBS<br>(PH=7)                            | ~97% (0.3 V <sub>RHE</sub> ) | This work |
| Co/CNNs             | 0.1 M PBS<br>(PH=7)                            | ~87% (0.3 V <sub>RHE</sub> ) | This work |
| K/CNNs              | 0.1 M PBS<br>(PH=7)                            | ~71% (0.3 V <sub>RHE</sub> ) | This work |
| CNNs                | 0.1 M PBS<br>(PH=7)                            | ~76% (0.3 V <sub>RHE</sub> ) | This work |
| MNCs                | 0.5 M H <sub>2</sub> SO <sub>4</sub><br>(PH=0) | ~90% (0.1 V <sub>RHE</sub> ) | 1         |
| Rh 1 /NC            | PBS<br>(PH=7)                                  | ~100%                        | 2         |
| Ni <sub>3</sub> B   | bicarbonate                                    | ~90% (0.3 V <sub>RHE</sub> ) | 3         |
| c-WO <sub>3</sub>   | 0.1M KOH<br>(PH=13)                            | 90%                          | 4         |
| Cr -ABIm            | -                                              | 65%                          | 5         |
| r Ni@rGO            | 0.1M<br>KOH(PH=13)                             | 89%                          | 6         |
| o-CoSe <sub>2</sub> | 0.05M H <sub>2</sub> SO <sub>4</sub>           | > 80%                        | 7         |

|                                  |                                                  |         |    |
|----------------------------------|--------------------------------------------------|---------|----|
| FeC-O                            | 0.1M<br>KOH(PH=13)                               | 95%     | 8  |
| c-WO <sub>3</sub>                | 0.1M KOH<br>(PH=13)                              | 90%     | 9  |
| Pd/C                             | -                                                | 95.1%   | 10 |
| CoSe <sub>2</sub>                | 0.5 M H <sub>2</sub> SO <sub>4</sub><br>( PH=0 ) | 92%     | 11 |
| Ni@B/N-CNTs-MS                   | 0.1M KOH<br>(PH=13)                              | ~90%    | 12 |
| NC-Ag/NHCS                       | 0.5 M H <sub>2</sub> SO <sub>4</sub><br>( PH=0 ) | 89%–91% | 13 |
| NiNb <sub>2</sub> O <sub>6</sub> | 0.1M KOH<br>(PH=13)                              | 96%     | 14 |
| Pd-Zn                            | -                                                | 90.0%   | 15 |
| MoO <sub>3-x</sub>               | 0.1M KOH<br>(PH=13)                              | 93%     | 16 |
| c-Mo/NCP                         | 0.1 M<br>PBS                                     | 77–85%  | 17 |
| MoSe <sub>2</sub> –MnP           | 0.1M KOH<br>(PH=13)                              | 97–98%  | 18 |
| TM SA/CNNS                       | 0.1 M<br>PBS                                     | 98%     | 19 |

**Table S2.** Comparison of direct anthraquinone and oxygen reduction reaction methods for the preparation of H<sub>2</sub>O<sub>2</sub>.

|                    | Indirect anthraquinone method                                                     | This work                                                                                                                           |
|--------------------|-----------------------------------------------------------------------------------|-------------------------------------------------------------------------------------------------------------------------------------|
| yield              | Stable hydrogenation efficiency above 11 g/L                                      | 31.7 g/L/24h                                                                                                                        |
| costs              | Pd noble metal catalysts: expensive and scarce raw materials                      | Transition metal-based materials: high chemical stability, cost advantages and electrocatalytic activity comparable to noble metals |
| harmful byproducts | Organic impurities in the product                                                 | H <sub>2</sub> O                                                                                                                    |
| Synthesis method   | There are four processes: hydrogenation, oxidation, extraction and post-treatment | Simple two-step synthesis                                                                                                           |
| security           | Organic solvents are flammable and explosive                                      | High security                                                                                                                       |

## REFERENCES

1. Park, J.; Nabaee, Y.; Hayakawa, T.; Kakimoto, M.-a., Highly Selective Two-Electron Oxygen Reduction Catalyzed by Mesoporous Nitrogen-Doped Carbon. *ACS Catalysis* **2014**, *4* (10), 3749-3754.
2. Chen, J.; Ma, Q.; Zheng, X.; Fang, Y.; Wang, J.; Dong, S., Kinetically restrained oxygen reduction to hydrogen peroxide with nearly 100% selectivity. *Nature Communications* **2022**, *13* (1).
3. Kelly, S. R.; Shi, X.; Back, S.; Vallez, L.; Park, S. Y.; Siahrostami, S.; Zheng, X.; Nørskov, J. K., ZnO As an Active and Selective Catalyst for Electrochemical Water Oxidation to Hydrogen Peroxide. *ACS Catalysis* **2019**, *9* (5), 4593-4599.
4. Chen, L.; Chen, C.; Yang, Z.; Li, S.; Chu, C.; Chen, B., Simultaneously Tuning Band Structure and Oxygen Reduction Pathway toward High-Efficient Photocatalytic Hydrogen Peroxide Production Using Cyano-Rich Graphitic Carbon Nitride. *Advanced Functional Materials* **2021**, *31* (46).
5. Zhang, H.; Wang, Z.; Wang, Z.; Wang, L.; Wang, Y., Valence State Modulation of Chromium in Selective Hydrogen Peroxide Production Electrocatalysts. *ACS Applied Energy Materials* **2021**, *4* (9), 10114-10123.
6. Nosan, M.; Strmčnik, D.; Brusko, V.; Kirsanova, M.; Finšgar, M.; Dimiev, A. M.; Genorio, B., Correlating nickel functionalities to selectivity for hydrogen peroxide electrosynthesis. *Sustainable Energy & Fuels* **2023**, *7* (9), 2270-2278.
7. Sheng, H.; Janes, A. N.; Ross, R. D.; Kaiman, D.; Huang, J.; Song, B.; Schmidt, J. R.; Jin, S., Stable and selective electrosynthesis of hydrogen peroxide and the electro-Fenton process on CoSe<sub>2</sub> polymorph catalysts. *Energy & Environmental Science* **2020**, *13* (11), 4189-4203.
8. Jiang, K.; Back, S.; Akey, A. J.; Xia, C.; Hu, Y.; Liang, W.; Schaak, D.; Stavitski, E.; Nørskov, J. K.; Siahrostami, S.; Wang, H., Highly selective oxygen reduction to hydrogen peroxide on transition metal single atom coordination. *Nat Commun* **2019**, *10* (1), 3997.
9. Jiang, H.; Wang, Y.; Hu, J.; Shai, X.; Zhang, C.; Le, T.; Zhang, L.; Shao, M., Phase regulation of WO<sub>3</sub> for highly selective oxygen reduction to hydrogen peroxide. *Chemical Engineering Journal* **2023**, 452.
10. Lee, S.; Jeong, H.; Chung, Y.-M., Direct synthesis of hydrogen peroxide over Pd/C catalyst prepared by selective adsorption deposition method. *Journal of Catalysis* **2018**, *365*, 125-137.
11. Ji, Y.; Liu, Y.; Zhang, B.-W.; Xu, Z.; Qi, X.; Xu, X.; Ren, L.; Du, Y.; Zhong, J.; Dou, S. X., Morphology engineering of atomic layer defect-rich CoSe<sub>2</sub> nanosheets for highly selective electrosynthesis of hydrogen peroxide. *Journal of Materials Chemistry A* **2021**, *9* (37), 21340-21346.
12. Xu, H.; Zhang, S.; Zhang, X.; Xu, M.; Geng, J.; Han, M.; Zhang, H., Melamine sponge templated synthesis of nickel nanoparticles encapsulated in B, N co-doped carbon nanotubes towards the selective electrosynthesis of hydrogen peroxide. *Journal of Materials Chemistry A* **2023**, *11* (19), 10204-10212.

13. Jin, M.; Liu, W.; Sun, J.; Wang, X.; Zhang, S.; Luo, J.; Liu, X., Highly dispersed Ag clusters for active and stable hydrogen peroxide production. *Nano Research* **2022**, *15* (7), 5842-5847.
14. Liu, C.; Li, H.; Chen, J.; Yu, Z.; Ru, Q.; Li, S.; Henkelman, G.; Wei, L.; Chen, Y., 3d Transition-Metal-Mediated Columbite Nanocatalysts for Decentralized Electrosynthesis of Hydrogen Peroxide. *Small* **2021**, *17* (13).
15. Wang, S.; Gao, K.; Li, W.; Zhang, J., Effect of Zn addition on the direct synthesis of hydrogen peroxide over supported palladium catalysts. *Applied Catalysis A: General* **2017**, *531*, 89-95.
16. Jiang, H.; Zhang, C.; Wang, Z.; Zhang, Y.; Le, T.; Mei, Y.; Feng, Y.; Hu, J., Enhanced two-electron oxygen reduction for hydrogen peroxide production via fine-tuning the concentration of oxygen vacancies in MoO. *Applied Catalysis A: General* **2023**, *661*.
17. Jin, M.; Liu, S.; Meng, G.; Zhang, S.; Liu, Q.; Luo, J.; Liu, X., Low-Coordinated Mo Clusters for High-Efficiency Electrocatalytic Hydrogen Peroxide Production. *Advanced Materials Interfaces* **2022**, *10* (1).
18. Kagkoura, A.; Stangel, C.; Arenal, R.; Tagmatarchis, N., Molybdenum Diselenide–Manganese Porphyrin Bifunctional Electrocatalyst for the Hydrogen Evolution Reaction and Selective Hydrogen Peroxide Production. *The Journal of Physical Chemistry C* **2022**, *126* (35), 14850-14858.
19. Yang, H.; Ma, F.; Lu, N.; Tian, S.; Liu, G.; Wang, Y.; Wang, Z.; Wang, D.; Tao, K.; Zhang, H.; Peng, S., Transition metal single atom-optimized g-C(3)N(4) for the highly selective electrosynthesis of H(2)O(2) under neutral electrolytes. *Nanoscale Horiz* **2023**, *8* (5), 695-704.
